# Supplementary material for: Nosema bombycis microRNA-like RNA 8 (Nb-milR8) Increases Fungal Pathogenicity by Modulating BmPEX16 Gene Expression in Its Host, Bombyx mori
Source: PubMed Central journal article supplement (PMC8549759; doi:10.1128/spectrum.01048-21), 2021-10-27
Supplement: spectrum01048-21_supp_1_seq11.pdf [file spectrum01048-21_supp_1_seq11.pdf]

## Supplementary material

### ***Nosema bombycis* microRNA-like RNA 8 (Nb-milR8) increases fungal pathogenicity by modulating *BmPEX16* gene expression in its host, *Bombyx mori***

Zhanqi Dong<sup>1,2†</sup>, Ning Zheng<sup>1†</sup>, Congwu Hu<sup>1</sup>, Boyuan Deng<sup>1</sup>, Wenxuan Fang<sup>1</sup>, Qin Wu<sup>1</sup>, Peng Chen<sup>1,2</sup>, Xuhua Huang<sup>3</sup>, Na Gao<sup>1†</sup>, Cheng Lu<sup>1,2‡</sup>, Minhui Pan<sup>1,2‡</sup>

(1. State Key Laboratory of Silkworm Genome Biology, Southwest University, Chongqing 400716, China;

2. Key Laboratory of Sericultural Biology and Genetic Breeding, Ministry of Agriculture and Rural Affairs, Southwest University, Chongqing 400716, China;

3. The General Extension Station of Sericulture Technology of Guangxi Zhuang Autonomous Region, Nanning 530007, China.)

†These authors contributed equally to this work.

‡Address correspondence to Cheng Lu, [Tel: +86-023-68250346](tel:+86-023-68250346), [Fax: +86-023-68251128](tel:+86-023-68251128), E-mail: [lucheng@swu.edu.cn](mailto:lucheng@swu.edu.cn), and Min-Hui Pan, [Tel: +86-023-68250076](tel:+86-023-68250076), [Fax: +86-23-68251128](tel:+86-23-68251128), E-mail: [pmh047@126.com](mailto:pmh047@126.com).

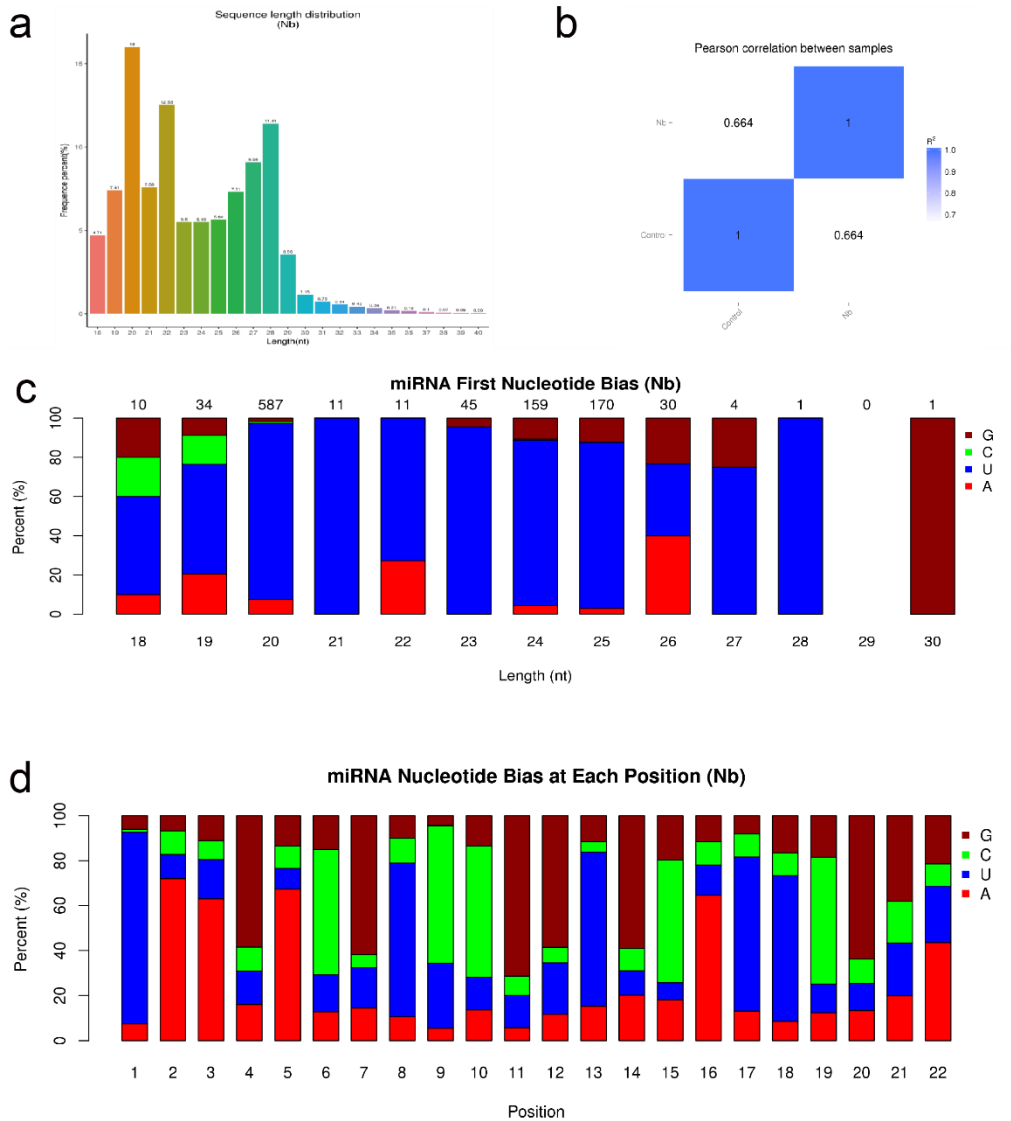

**Fig. S1. Characterization of miRNAs in the Nb group treatment.**

(A) The length distribution of sRNAs based on small RNA sequences in the Nb group sequencing libraries. (B) Heatmap of miRNA expression among samples. (C) First nucleotide bias of miRNAs identified in *N. bombycis*. (D) Nucleotide bias at each position within miRNA candidates in *N. bombycis*.

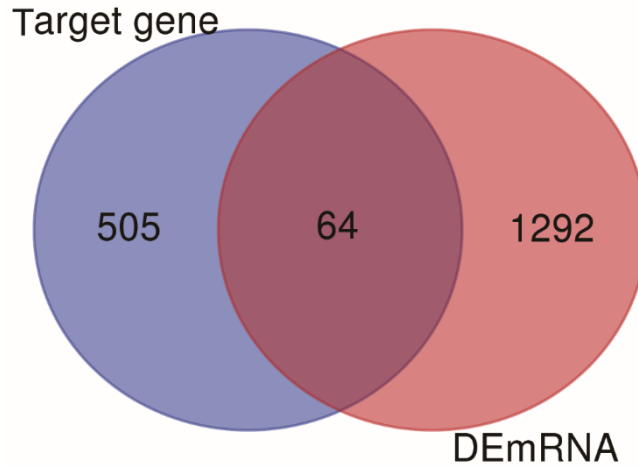

**Fig. S2. Venn Diagram depicting the Nb-milR8 targeted genes and significantly downregulated gene after *N. bombycis* infection.** Target gene indicate 569 target genes were predicted for Nb-milR8 in *Bombyx mori*. DEmRNA indicate a difference comparative threshold of  $\geq 2$  between the control group and the N.b group.

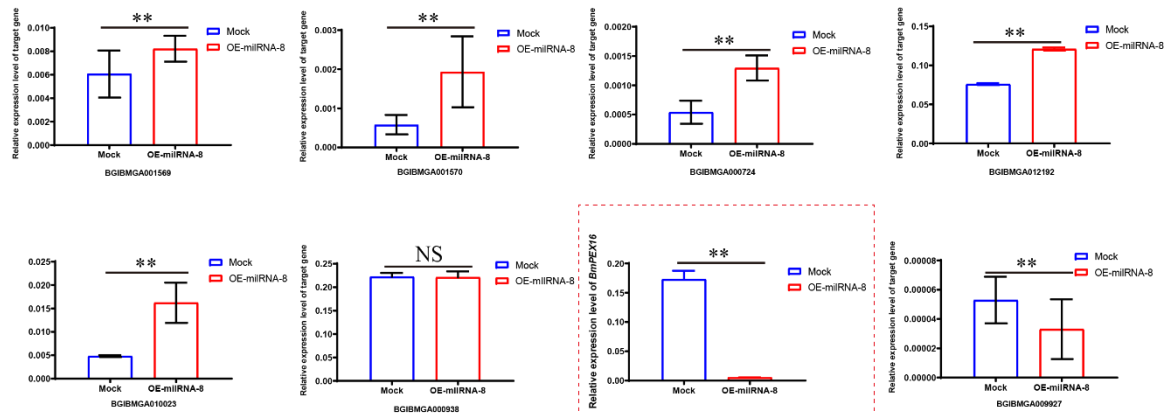

**Fig. S3. Relative expression of target genes after overexpression of Nb-milR8.** All data represent means of three replicates  $\pm$  SD. \*\*:  $p < 0.01$ .

**Supplementary Table 1. Primers used in this study.**

| Name       | 序列                      |
|------------|-------------------------|
| BmActin/F  | CATGAAGATCCTCACCGAGCG   |
| BmActin/R  | CGTAGCACAGCTTCTCCTTGATA |
| NbssuRNA/F | GTCCCTGTTCTTTGTAC       |

|             |                                                  |
|-------------|--------------------------------------------------|
| NbssuRNA/R  | ATCCTGCTAATGGTTCT                                |
| U6/F        | CTCGCTTCGGCAGCACA                                |
| U6/R        | AACGCTTCACGAATTTGCGT                             |
| milRNA-1/F  | CTCAACTGGTGTCGTGGAGTCGGCAATTCAGTTGA<br>GCGAATGCA |
| milRNA-1/R  | ACACTCCAGCTGGGTAAGACGTCCGG                       |
| milRNA-2/F  | CTCAACTGGTGTCGTGGAGTCGGCAATTCAGTTGA<br>GGGCTCGTC |
| milRNA-2/R  | ACACTCCAGCTGGGTATTATTGTAGTTAGAA                  |
| milRNA-3/F  | CTCAACTGGTGTCGTGGAGTCGGCAATTCAGTTGA<br>GTCAACCGC |
| milRNA-3/R  | ACACTCCAGCTGGGTAAAGATTTTCATAGA                   |
| milRNA-4/F  | CTCAACTGGTGTCGTGGAGTCGGCAATTCAGTTGA<br>GTCGTCCAG |
| milRNA-4/R  | ACACTCCAGCTGGGTTTAGCGTCGTAAAGTG                  |
| milRNA-5/F  | CTCAACTGGTGTCGTGGAGTCGGCAATTCAGTTGA<br>GTGTGAACG |
| milRNA-5/R  | ACACTCCAGCTGGGTCGGCGTTGTGGTTTA                   |
| milRNA-6/F  | CTCAACTGGTGTCGTGGAGTCGGCAATTCAGTTGA<br>GAAGCTTCA |
| milRNA-6/R  | ACACTCCAGCTGGGTATTTAGATCAAAGGTT                  |
| milRNA-8/F  | CTCAACTGGTGTCGTGGAGTCGGCAATTCAGTTGA<br>GTGTCCTAC |
| milRNA-8/R  | ACACTCCAGCTGGGTACATGTATTGCAATC                   |
| milRNA-9/F  | CTCAACTGGTGTCGTGGAGTCGGCAATTCAGTTGA<br>GAATCTACA |
| milRNA-9/R  | ACACTCCAGCTGGGTTCCGAAATCGTCTGCT                  |
| milRNA-10/F | CTCAACTGGTGTCGTGGAGTCGGCAATTCAGTTGA<br>GATGTCAGG |
| milRNA-10/R | ACACTCCAGCTGGGTGACATGCTGTTAAA                    |
| milRNA-11/F | CTCAACTGGTGTCGTGGAGTCGGCAATTCAGTTGA<br>GGGTTTACG |
| milRNA-11/R | ACACTCCAGCTGGGTTTCCGATATTTTGGG                   |
| milRNA-12/F | CTCAACTGGTGTCGTGGAGTCGGCAATTCAGTTGA              |

|                 |                                      |
|-----------------|--------------------------------------|
|                 | GTTGCCAGA                            |
| milRNA-12/R     | ACACTCCAGCTGGGTCTTTGCTGTAATGTT       |
| OE-BmPX16/F     | CTAGCGTCTACGATGCGGTTCACTTCACGGTGGTA  |
| OE-BmPX16/R     | ACATGTAACCGG                         |
|                 | TTACATGTTACCACCGTGAAGTGAACCGCATCGTA  |
|                 | GACG                                 |
|                 | ACTTACGCTGAGTACTTCGAAATGT            |
|                 | CGTGAAGTGAACCGCATCGTAGACG            |
| BGIBMGA002029/F | AAGTATACTGAAGGCCGAGATG               |
| BGIBMGA002029/R | TCCATCAACACGTCTCATAACA               |
| BGIBMGA009927/F | CTCTGCGAAGAGTTCAACAATC               |
| BGIBMGA009927/R | GAACGAACTCAGGACAGGAA                 |
| BGIBMGA010023/F | CCAACTTCCATATCCTGTCTGT               |
| BGIBMGA010023/R | TCATTTTCGTATGTCAGAACCGA              |
| BGIBMGA001569/F | AATGGAGCAAGAGGAAGAAGAA               |
| BGIBMGA001569/R | TCATCCAAAGGCCATGTATCTT               |
| BGIBMGA001570/F | CGTTAGAGGTGAGGATGTCTAC               |
| BGIBMGA001570/R | TTTCTTGTCTGTCTCGAGTAC                |
| BGIBMGA000724/F | GTTACGGAAATTGTTTGGAGCT               |
| BGIBMGA000724/R | GTTAACCAATCTTTTGCCACCT               |
| BGIBMGA000938/F | AGAGGCGAGTTGTGTTTATACA               |
| BGIBMGA000938/R | CTTCTGCAGGAAGTACTTCTGA               |
| BGIBMGA012192/F | ATTCGTGAGACAAAAGAAACCG               |
| BGIBMGA012192/R | ACCTTTAACATTTCCCTGGTCCT              |
| Cas13a/F        | ACCAAACGACTAGGGATCTACTCGAGATGTATCCG  |
|                 | TATGACGTCC                           |
| Cas13a/R        | TGGTATGGCTGATTATGATCGCGGCCGCTCACTTCT |
|                 | TCTTCTTAG                            |
| ssBmPEX16/F     | AAACCGCAGTGTACTTCTTGCAACGACAAT       |
| ssBmPEX16/R     | AAAA ATTGTCGTTGCAAGAAGTGTACTGCTGC    |

\* (The restriction enzyme sites are marked in lower case.)

**Table S2. Predicted sequence of *N. bombycis*-encoded miRNAs**

| miRNA | Sequence (5'-3') | Length | Reads |
|-------|------------------|--------|-------|
|-------|------------------|--------|-------|

|           |                          | (nt) |     |
|-----------|--------------------------|------|-----|
| Nb-milR1  | UAAGACGUCCGGUGCAUUCG     | 20   | 604 |
| Nb-milR2  | UAUUAUUGUAGUUAGAAGACGAGC | 25   | 77  |
|           | C                        |      |     |
| Nb-milR3  | UAAAGAUUUUCAUAGAGCGGUUGA | 24   | 56  |
| Nb-milR4  | UUUAGCGUCGUAAAGUGCUGGACG | 26   | 19  |
|           | A                        |      |     |
| Nb-milR5  | UCGGCGUUGUGGUUUACGUUCACA | 24   | 7   |
| Nb-milR6  | UAUUUAGAUCAAAGGUUUGAAGCU | 25   | 22  |
|           | U                        |      |     |
| Nb-milR8  | UACAUGUAUUGCAAUCGUAGGACA | 24   | 23  |
| Nb-milR9  | UCCGAAAUCGUCUGCUUGUAGAU  | 25   | 34  |
|           | U                        |      |     |
| Nb-milR10 | UGACAUGCUGUAAAACCGACAUC  | 24   | 41  |
| Nb-milR11 | UUUCCGAUAUUUUGGGCGUAAACC | 24   | 21  |
| Nb-milR12 | UCUUUGCUGUAAUGUUUCUGGCAA | 24   | 11  |

**Table S3. Library preparation quality statistics.**

| Sample  | Raw reads  | Error rate | Q20    | Q30    | GC content | Clean reads         |
|---------|------------|------------|--------|--------|------------|---------------------|
| Nb      | 126,573,70 | 0.01%      | 99.35% | 97.71% | 50.82%     | 12,081,520 (95.45%) |
| Control | 19,108,751 | 0.01%      | 99.32% | 97.48% | 49.03%     | 18,766,136 (98.21%) |
